# Supplementary material for: Fingernail Onychomycosis: A Laboratory-Based Retrospective Study with Species Profiling and Antifungal Susceptibility of Yeasts
Source: MDPI journal article supplement (doi:10.3390/jcm15010325), 2026-01-01
Supplement: s1 [file jcm-4040635-supplementary.pdf › jcm-4040635-supplementary.pdf]

# Fingernail onychomycosis: a laboratory-based retrospective study with species profiling and antifungal susceptibility of yeasts

Paweł Krzyściak <sup>1\*</sup>, Zuzanna Tokarz <sup>2</sup>, Monika Pomorska-Wesołowska <sup>3</sup>, Magdalena Skóra <sup>4</sup>, Andrzej Jaworek <sup>5</sup> and Jadwiga Wójkowska-Mach <sup>6,\*</sup>

## Supplementary material

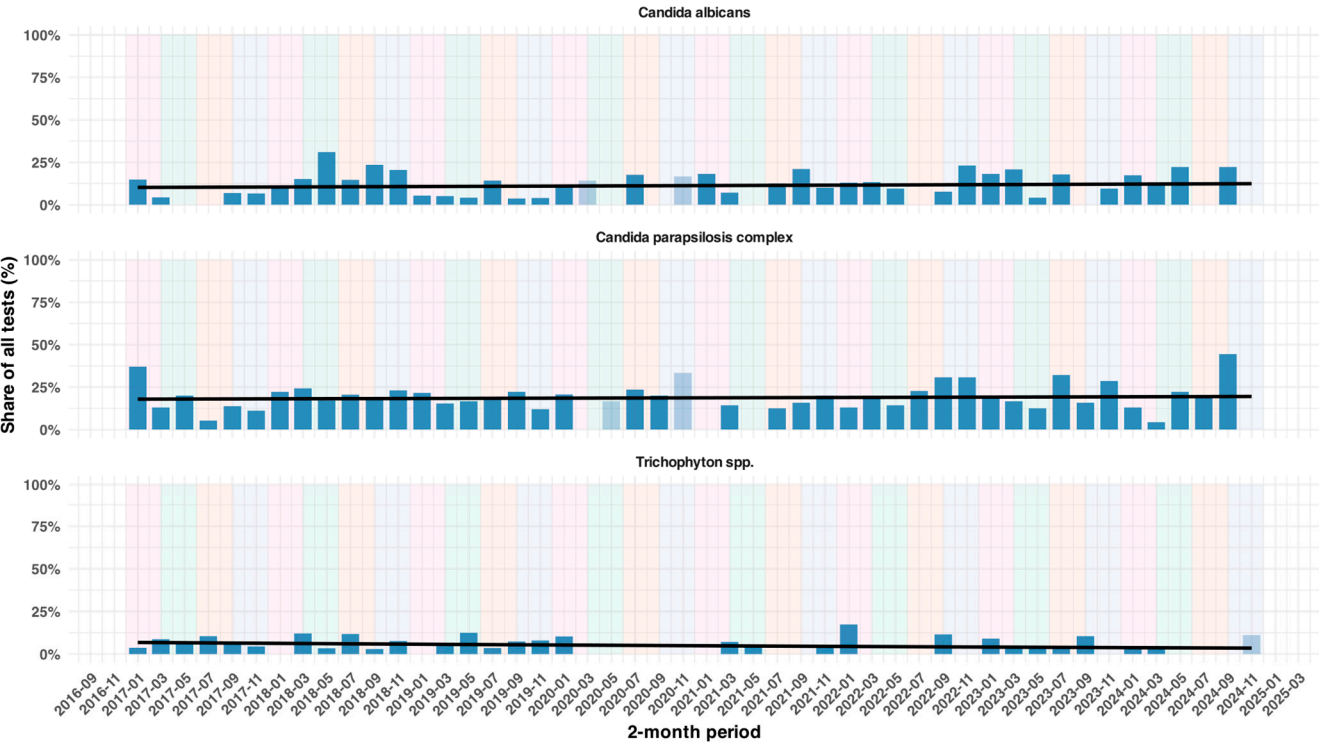

**Figure S1.** Bimonthly distribution of selected fungal species isolated from fingernails. Bars show the percentage of positive samples in each 2-month period, the black line represents a binomial generalized linear model (binomial GLM) fit weighted by the total number of samples, and semi-transparent bars indicate periods with fewer than 10 samples.

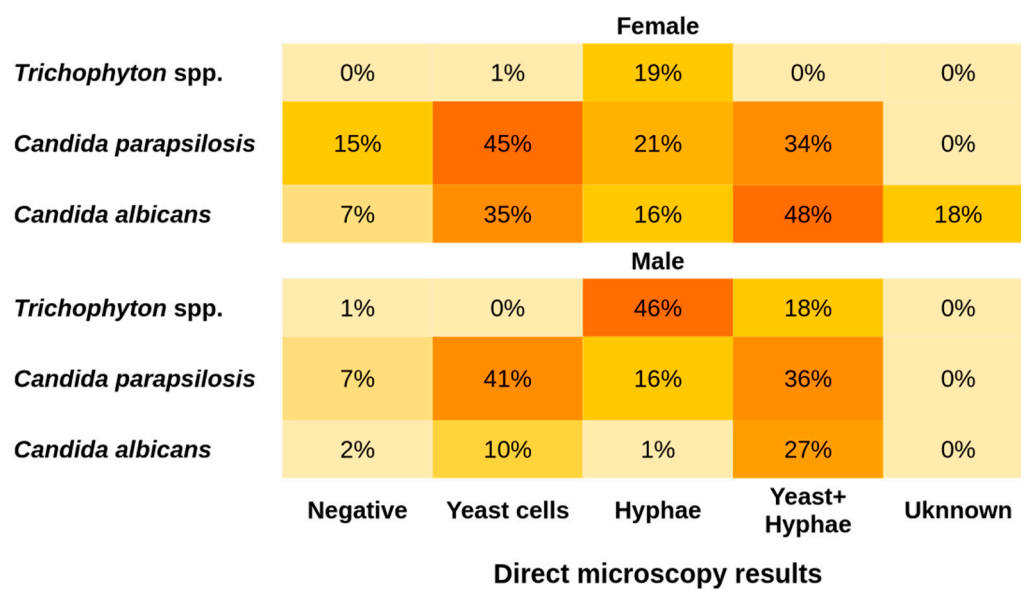

**Figure S2.** Heatmap showing direct microscopy findings across major fungal groups identified in culture. Percentages are based on all samples in each microscopy-by-sex group; a single sample can contribute to more than one fungal group if multiple organisms are present.

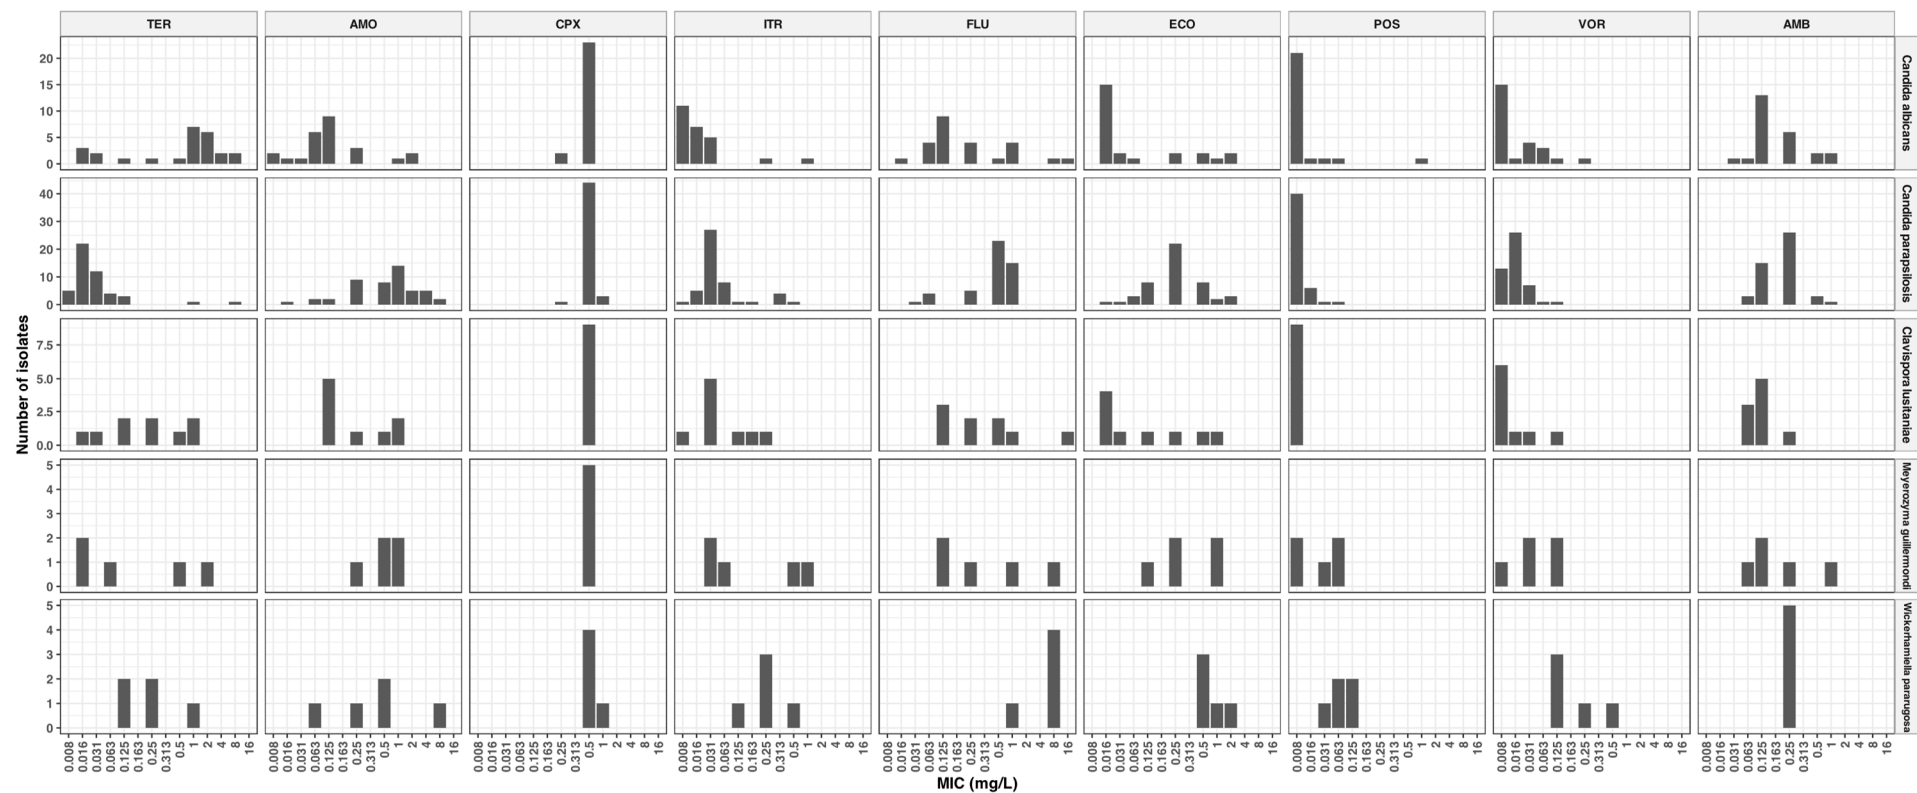

**Figure S3.** MIC distributions for fungal species–drug combinations with at least five isolates. Each panel shows the distribution of minimum inhibitory concentration (MIC) values for a specific species–antifungal pair. Bars represent the number of isolates at each observed MIC value (mg/L).

**Table S1.** Minimal inhibitory concentration (MIC) values (mg/L) for yeasts represented by small numbers in the study material.

| Species (n)                           | AMB   | AMO   | CPX  | ECO   | FLU   | ITR   | POS   | TER   | VOR   |
|---------------------------------------|-------|-------|------|-------|-------|-------|-------|-------|-------|
| <i>Candida dubliniensis</i> (1)       | 0.25  | 0.031 | 1    | 0.016 | 0.25  | 0.031 | 0.008 | 4     |       |
| <i>Candida metapsilosis</i> (1)       | 0.125 | 0.125 | 1    | 0.125 | 1     | 0.063 | 0.016 | 0.016 |       |
| <i>Candida orthopsilosis</i> (2)      | 0.125 | 1     | 0.5  | 16    | 64    | 1     | 0.063 | 0.025 | 8     |
|                                       | 0.25  | 0.063 | 0.5  | 0.016 | 0.125 | 0.016 | 0.008 | 1     | 0.008 |
| <i>Candida sake</i> (1)               | 0.063 | 0.25  | 0.5  | 0.5   | 8     | 0.25  | 0.031 | 0.25  | 0.25  |
| <i>Candida tropicalis</i> (3)         | 0.125 | 0.031 | 0.5  | 0.016 | 0.125 | 0.008 | 0.008 | 0.5   | 0.008 |
|                                       | 0.125 | 0.25  | 0.5  | 0.5   | 0.125 | 0.125 | 0.031 | 2     | 0.5   |
|                                       | 0.5   | 0.063 | 0.5  | 0.25  | 1     | 0.031 | 0.016 | 8     | 0.063 |
| <i>Candida zeylanoides</i> (2)        | 0.25  | 0.016 | 0.5  | 0.031 | 1     | 0.016 | 0.008 | 0.016 | 0.031 |
|                                       | 0.125 | 0.063 | 0.5  | 0.016 | 0.125 | 0.016 | 0.008 | 1     | 0.008 |
| <i>Hanseniospora uvarum</i> (1)       | 0.25  | 0.5   | 0.5  | 1     | 1     | 0.25  | 0.125 | 0.25  | 0.125 |
| <i>Kazachstania sanazzi</i> (1)       | 0.031 | 0.016 | 0.25 | 0.016 | 0.25  | 0.031 | 0.063 | 0.25  | 0.25  |
| <i>Kluyveromyces marxianus</i> (1)    | 0.5   | 0.125 | 0.5  | 0.016 | 0.5   | 0.063 | 0.016 | 8     | 0.031 |
| <i>Lodderomyces elongiosporus</i> (2) | 0.063 | 0.016 | 0.25 | 0.016 | 0.063 | 0.008 | 0.008 | 0.008 | 0.008 |
|                                       | 0.063 | 0.063 | 0.5  | 0.031 | 0.125 | 0.031 | 0.016 | 0.016 | 0.008 |
| <i>Magusiomyces cepitatus</i> (1)     | 1     | 4     | 0.5  | 2     | 16    | 0.25  | 0.25  | 2     | 0.25  |
| <i>Naganishia diffluens</i> (2)       | 0.25  | 8     | 0.25 | 1     | 64    | 8     | 8     | 8     | 8     |
|                                       | 0.25  | 8     | 0.25 | 1     | 64    | 8     | 8     | 8     | 8     |
| <i>Rhodothorula</i> sp. (1)           | 0.25  | 0.25  | 0.25 | 1     | 64    | 8     | 8     | 8     | 2     |
| <i>Yarrowia lypolytica</i> (1)        | 0.25  | 0.063 | 0.5  | 0.016 | 0.125 | 0.016 | 0.008 | 2     | 0.008 |

**Table S2.** Concordance between direct microscopic evaluation of fingernail samples and culture results. The table shows the number of samples by isolated fungal groups (dermatophytes, ascomycetous yeasts, basidiomycetous yeasts, non-dermatophyte moulds, culture-negative) and by microscopy findings.

| Culture result                  | Microscopic examination result |            |           |            | Total      |
|---------------------------------|--------------------------------|------------|-----------|------------|------------|
|                                 | Hyphae                         | Yeasts     | Mixed     | Negative   |            |
| <b>Dermatophytes</b>            | 49                             | 1          | 2         | 4          | <b>56</b>  |
| <b>Ascomycetous yeasts</b>      | 35                             | 130        | 29        | 165        | <b>359</b> |
| <b>Basidiomycetoeus yeasts</b>  | 4                              | 3          | 1         | 19         | <b>27</b>  |
| <b>Non dermatophyte- moulds</b> | 14                             | 1          | 1         | 10         | <b>26</b>  |
| <b>Negative</b>                 | 38                             | 18         | 7         | 532        | <b>595</b> |
| <b>Total</b>                    | <b>140</b>                     | <b>153</b> | <b>40</b> | <b>730</b> |            |

**Table S3.** Distribution of periungual swab outcomes across operational diagnostic categories. Swab outcomes were classified as *swab negative* (no growth), *swab intermediate* (1–4 colonies), *swab positive concordant* (growth in both swab and nail samples), and *swab positive discordant* (growth detected in the swab only). Percentages are shown within each swab category across diagnostic groups (NEG, DbtPOS, PrbPOS, PssPOS, PrvPOS; see Table 1 in the main text). Swab outcomes were significantly associated with diagnostic classification ( $\chi^2$ ,  $p < 0.001$ ).

| Periungual swab outcome                                                    | NEG           | DbtPOS        | PrbPOS       | PssPOS        | PrvPOS        | Total          |
|----------------------------------------------------------------------------|---------------|---------------|--------------|---------------|---------------|----------------|
| <b>Total negative swab</b>                                                 | 78            | 14            | 5            | 8             | 14            | 119            |
| • <b>negative concordance (swab– / nail–)</b>                              | 69<br>(88.5%) | 10<br>(71.4%) | 0            | 0             | 0             | 79<br>(66.4%)  |
| • <b>discordant (swab– / nail+)</b>                                        | 9             | 4             | 5            | 8             | 14            | 40             |
| <b>Total positive swab</b>                                                 | 33<br>(29.7%) | 19<br>(57.8%) | 7<br>(58.3%) | 19<br>(70.4%) | 45<br>(76.3%) | 123<br>(50.8%) |
| • <b>positive <math>\geq 5</math> CFU</b>                                  | 17            | 14            | 1            | 17            | 40            | 89             |
| • <b>intermediate 1–4 CFU</b>                                              | 16            | 5             | 6            | 2             | 5             | 34             |
| • <b>concordant growth (swab+, nail+)</b>                                  | 9             | 9             | 7            | 19            | 45            | 89             |
| • <b>concordant species</b>                                                | 8<br>(89.9%)  | 8<br>(89.9%)  | 6<br>(85.7%) | 19<br>(100%)  | 42<br>(93.3%) | 83<br>(93.3%)  |
| • <b>discordant (swab+, nail–)</b>                                         | 24            | 10            | 0            | 0             | 0             | 34             |
| <b>Total</b>                                                               | <b>111</b>    | <b>33</b>     | <b>12</b>    | <b>27</b>     | <b>59</b>     | <b>242</b>     |
| • <b>Overall concordance (swab–/nail–) <math>\cup</math> (swab+/nail+)</b> | 77<br>(69.4%) | 18<br>(54.5%) | 6<br>(50%)   | 19<br>(70.4%) | 42<br>(71.2%) | 162<br>(66.9%) |

**Table S4** Comprehensive distribution and frequency of all fungal species identified in fingernail onychomycosis

| Group of Fungi |              | Genus         | Species                       | Number | Percentage |
|----------------|--------------|---------------|-------------------------------|--------|------------|
| YEAST          | ASCOMYCETOUS | CANDIDA       | <i>Candida albicans</i>       | 120    | 18.52      |
|                |              |               | <i>Candida dubliniensis</i>   | 2      | 0.31       |
|                |              |               | <i>Candida metapsilosis</i>   | 2      | 0.31       |
|                |              |               | <i>Candida orthopsilosis</i>  | 6      | 0.93       |
|                |              |               | <i>Candida parapsilosis</i>   | 200    | 30.86      |
|                |              |               | <i>Candida tropicalis</i>     | 11     | 1.70       |
|                |              |               |                               | 341    | 52.62      |
|                |              | HANSENIOSPORA | <i>Hanseniospora opuntiae</i> | 1      | 0.15       |
|                |              |               | <i>Hanseniospora uvarum</i>   | 10     | 1.54       |
|                |              |               |                               | 11     | 1.70       |
|                |              | PICHIA        | <i>Pichia inconspicua</i>     | 1      | 0.15       |
|                |              |               | <i>Pichia kudriavzevii</i>    | 3      | 0.46       |

| Group of Fungi |                 | Genus         | Species                                                  | Number | Percentage |
|----------------|-----------------|---------------|----------------------------------------------------------|--------|------------|
|                |                 |               |                                                          | 4      | 0.62       |
|                |                 | OTHER SPECIES | <i>Clavispora lusitaniae</i>                             | 27     | 4.17       |
|                |                 |               | <i>Cyberlindnera jadinii</i>                             | 1      | 0.15       |
|                |                 |               | <i>Debaryomyces hansenii</i>                             | 7      | 1.08       |
|                |                 |               | <i>Geotrichum candidum</i>                               | 8      | 1.23       |
|                |                 |               | <i>Kluyveromyces marxianus</i>                           | 1      | 0.15       |
|                |                 |               | <i>Kurtzmaniella zeylanoides</i>                         | 6      | 0.93       |
|                |                 |               | <i>Lodderomyces elongisporus</i>                         | 4      | 0.62       |
|                |                 |               | <i>Magnusiomyces capitatis</i>                           | 1      | 0.15       |
|                |                 |               | <i>Meyerozyma guilliermondii</i>                         | 13     | 2.00       |
|                |                 |               | <i>Nakaseomyces glabratus</i>                            | 1      | 0.15       |
|                |                 |               | <i>Saccharomyces cerevisiae</i>                          | 3      | 0.46       |
|                |                 |               | <i>Spathaspora sake</i>                                  | 1      | 0.15       |
|                |                 |               | <i>Starmerella magnoliae</i>                             | 1      | 0.15       |
|                |                 |               | <i>Sungouiella intermedia</i>                            | 8      | 1.23       |
|                |                 |               | <i>Torulaspora delbrueckii</i>                           | 1      | 0.15       |
|                |                 |               | <i>Wickerhamiella pararugosa</i>                         | 10     | 1.54       |
|                |                 |               | <i>Yarrowia lipolytica</i>                               | 13     | 2.00       |
|                |                 |               |                                                          | 106    | 16.36      |
|                |                 |               | <i>Candida sp. (not species ID)</i>                      | 23     | 3.55       |
|                |                 |               |                                                          | 485    | 74.85      |
|                | BASIDIOMYCETOUS | AUREOBASIDIUM | <i>Aureobasidium pullulans</i>                           | 4      | 0.62       |
|                |                 | SKIN          |                                                          |        |            |
|                |                 | CRYPTOCOCCI   | <i>Filobasidium, Naganishia, Papillotrema,</i>           | 24     | 3.7        |
|                |                 | RHODOTORULA   | <i>Rhodotorula mucilaginosa</i>                          | 1      | 0.15       |
|                |                 |               | <i>Rhodotorula sp. (not species ID)</i>                  | 42     | 6.48       |
|                |                 |               |                                                          | 43     | 6.64       |
|                |                 | TRICHOSPORON  | <i>Trichosporon faecale</i>                              | 1      | 0.15       |
|                |                 |               | <i>Trichosporon japonicum</i>                            | 1      | 0.15       |
|                |                 |               |                                                          | 2      | 0.30       |
|                |                 |               |                                                          | 73     | 11.27      |
|                |                 |               |                                                          | 558    | 86.12      |
| DERMATOPHYTES  |                 | TRICHOPHYTON  | <i>Trichophyton interdigitale/mentagrophytes</i> COMPLEX | 4      | 0.62       |
|                |                 |               | <i>Trichophyton rubrum</i>                               | 51     | 7.87       |
|                |                 |               | <i>Trichophyton tonsurans</i>                            | 1      | 0.15       |
|                |                 |               |                                                          | 56     | 8.64       |
| MOULDS         |                 | ASPERGILLUS   | <i>Aspergillus flavus</i>                                | 1      | 0.15       |
|                |                 |               | <i>Aspergillus fumigatus</i>                             | 1      | 0.15       |
|                |                 |               | <i>Aspergillus niger</i>                                 | 1      | 0.15       |
|                |                 |               | <i>Aspergillus versicolor</i>                            | 6      | 0.93       |
|                |                 |               | <i>Aspergillus sp.</i>                                   | 1      | 0.15       |
|                |                 |               |                                                          | 10     | 1.54       |
|                |                 | FUSARIUM      | <i>Fusarium solani</i>                                   | 1      | 0.15       |
|                |                 |               | <i>Fusarium sp. (no species ID)</i>                      | 12     | 1.85       |
|                |                 |               |                                                          | 13     | 2.01       |
|                |                 | OTHER GENRA   | <i>Acremonium sp. (no species ID)</i>                    | 2      | 0.31       |
|                |                 |               | <i>Alternaria sp. (no species ID)</i>                    | 3      | 0.46       |
|                |                 |               | <i>Chaetomium sp. (no species ID)</i>                    | 1      | 0.15       |
|                |                 |               | <i>Chrysosporium sp. (no species ID)</i>                 | 2      | 0.31       |

| Group of Fungi | Genus | Species                                 | Number | Percentage |
|----------------|-------|-----------------------------------------|--------|------------|
|                |       | <i>Scedosporium</i> sp. (no species ID) | 1      | 0.15       |
|                |       | <i>Scopulariopsis brevicaulis</i>       | 2      | 0.31       |
|                |       |                                         | 11     | 1.70       |
|                |       |                                         | 34     | 5.25       |
| TOTAL          |       |                                         | 648    | 100        |
